# Supplementary material for: Inflammatory bowel disease is associated with worse sexual function: a systematic review and meta-analysis
Source: PubMed Central journal article supplement — Transl Androl Urol. 2022 Jul;11(7):959–73. doi: 10.21037/tau-22-190 (PMC9360519; doi:10.21037/tau-22-190), 2022-07

## MOOSE (Meta-analyses of Observational Studies in Epidemiology) Checklist

| Item No                             | Recommendation                                                                          | Reported on Page Number/Line Number | Reported on Section/Paragraph |
|-------------------------------------|-----------------------------------------------------------------------------------------|-------------------------------------|-------------------------------|
| <b>Reporting of Background</b>      |                                                                                         |                                     |                               |
| 1                                   | Problem definition                                                                      |                                     |                               |
| 2                                   | Hypothesis statement                                                                    |                                     |                               |
| 3                                   | Description of Study Outcome(s)                                                         |                                     |                               |
| 4                                   | Type of exposure or intervention used                                                   |                                     |                               |
| 5                                   | Type of study design used                                                               |                                     |                               |
| 6                                   | Study population                                                                        |                                     |                               |
| <b>Reporting of Search Strategy</b> |                                                                                         |                                     |                               |
| 7                                   | Qualifications of searchers (eg, librarians and investigators)                          |                                     |                               |
| 8                                   | Search strategy, including time period included in the synthesis and keywords           |                                     |                               |
| 9                                   | Effort to include all available studies, including contact with authors                 |                                     |                               |
| 10                                  | Databases and registries searched                                                       |                                     |                               |
| 11                                  | Search software used, name and version, including special features used (eg, explosion) |                                     |                               |
| 12                                  | Use of hand searching (eg, reference lists of obtained articles)                        |                                     |                               |
| 13                                  | List of citations located and those excluded, including justification                   |                                     |                               |
| 14                                  | Method for addressing articles published in languages other than English                |                                     |                               |
| 15                                  | Method of handling abstracts and unpublished studies                                    |                                     |                               |
| 16                                  | Description of any contact with authors                                                 |                                     |                               |

| <b>Reporting of Methods</b>     |                                                                                                                                                                                                                                                                              |  |  |
|---------------------------------|------------------------------------------------------------------------------------------------------------------------------------------------------------------------------------------------------------------------------------------------------------------------------|--|--|
| 17                              | Description of relevance or appropriateness of studies assembled for assessing the hypothesis to be tested                                                                                                                                                                   |  |  |
| 18                              | Rationale for the selection and coding of data (eg, sound clinical principles or convenience)                                                                                                                                                                                |  |  |
| 19                              | Documentation of how data were classified and coded (eg, multiple raters, blinding, and interrater reliability)                                                                                                                                                              |  |  |
| 20                              | Assessment of confounding (eg, comparability of cases and controls in studies where appropriate)                                                                                                                                                                             |  |  |
| 21                              | Assessment of study quality, including blinding of quality assessors; stratification or regression on possible predictors of study results                                                                                                                                   |  |  |
| 22                              | Assessment of heterogeneity                                                                                                                                                                                                                                                  |  |  |
| 23                              | Description of statistical methods (eg, complete description of fixed or random effects models, justification of whether the chosen models account for predictors of study results, dose-response models, or cumulative meta-analysis) in sufficient detail to be replicated |  |  |
| 24                              | Provision of appropriate tables and graphics                                                                                                                                                                                                                                 |  |  |
| <b>Reporting of Results</b>     |                                                                                                                                                                                                                                                                              |  |  |
| 25                              | Graphic summarizing individual study estimates and overall estimate                                                                                                                                                                                                          |  |  |
| 26                              | Table giving descriptive information for each study included                                                                                                                                                                                                                 |  |  |
| 27                              | Results of sensitivity testing (eg, subgroup analysis)                                                                                                                                                                                                                       |  |  |
| 28                              | Indication of statistical uncertainty of findings                                                                                                                                                                                                                            |  |  |
| <b>Reporting of Discussion</b>  |                                                                                                                                                                                                                                                                              |  |  |
| 29                              | Quantitative assessment of bias (eg, publication bias)                                                                                                                                                                                                                       |  |  |
| 30                              | Justification for exclusion (eg, exclusion of non-English-language citations)                                                                                                                                                                                                |  |  |
| 31                              | Assessment of quality of included studies                                                                                                                                                                                                                                    |  |  |
| <b>Reporting of Conclusions</b> |                                                                                                                                                                                                                                                                              |  |  |
| 32                              | Consideration of alternative explanations for observed results                                                                                                                                                                                                               |  |  |
| 33                              | Generalization of the conclusions (ie, appropriate for the data presented and within the domain of the literature review)                                                                                                                                                    |  |  |
| 34                              | Guidelines for future research                                                                                                                                                                                                                                               |  |  |
| 35                              | Disclosure of funding source                                                                                                                                                                                                                                                 |  |  |

*From:* Stroup DF, Berlin JA, Morton SC, *et al.*, for the Meta-analysis Of Observational Studies in Epidemiology (MOOSE) Group. Meta-analysis of Observational Studies in Epidemiology. A Proposal for Reporting. JAMA. 2000;283(15):2008-2012. doi: 10.1001/jama.283.15.2008.

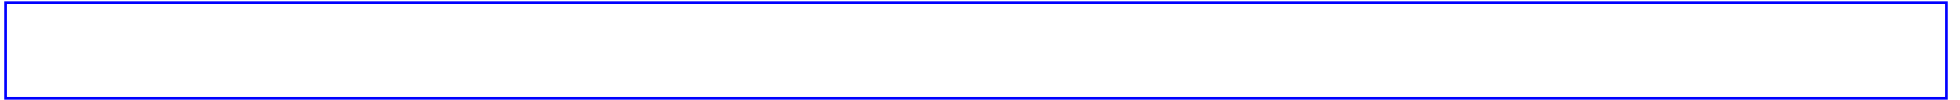

Supplement: tau-11-07-959-rc.pdf [file tau-11-07-959-rc.pdf]
